# Supplementary material
Source: Springer Nature journal article supplement (http://www.nature.com/embor/journal/v8/n11/extref/7401095-s1.pdf)
Supplement: 7401095-s1.pdf [file 7401095-s1.pdf]

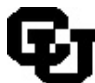

# AUTHORSHIP AND MEDICAL SCHOOL FACULTY PROMOTION SURVEY

1. Are you currently the chair of your medical school's academic promotion committee?

- Yes     No

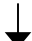

Please describe your role in promotions at your medical school.

---

---

---

---

2. Does your medical school have tenure track faculty positions?

- Yes     No

3. In your opinion, how important are the following for promotion of an *assistant professor* to an *associate professor* with tenure?

|                                                                        | VERY IMPORTANT        | MODERATELY IMPORTANT  | SLIGHTLY IMPORTANT    | NOT IMPORTANT         |
|------------------------------------------------------------------------|-----------------------|-----------------------|-----------------------|-----------------------|
| a. Total number of publications                                        | <input type="radio"/> | <input type="radio"/> | <input type="radio"/> | <input type="radio"/> |
| b. The prestige of the journals where the candidate has published      | <input type="radio"/> | <input type="radio"/> | <input type="radio"/> | <input type="radio"/> |
| c. Number of publications with the candidate as a first author         | <input type="radio"/> | <input type="radio"/> | <input type="radio"/> | <input type="radio"/> |
| d. Number of publications with the candidate as a middle author        | <input type="radio"/> | <input type="radio"/> | <input type="radio"/> | <input type="radio"/> |
| e. Number of publications with the candidate as a last author          | <input type="radio"/> | <input type="radio"/> | <input type="radio"/> | <input type="radio"/> |
| f. Number of publications with the candidate as a corresponding author | <input type="radio"/> | <input type="radio"/> | <input type="radio"/> | <input type="radio"/> |
| e. Other: _____                                                        | <input type="radio"/> | <input type="radio"/> | <input type="radio"/> | <input type="radio"/> |

4. Do you feel that any of the criteria in Question 3 are **undervalued** by your promotion committee?

- Yes     No

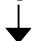

Please write in the letter(s) preceding the undervalued criteria listed above in question 3: \_\_\_\_\_

5. Do you feel that any of the criteria in Question 3 are **overvalued** by your promotion committee?

- Yes     No

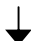

Please write in the letter(s) preceding the overvalued criteria listed above in question 3: \_\_\_\_\_

6. In my experience, granting authorship to a person not meeting a journal's authorship criteria is a common occurrence.

- Strongly Agree     Agree     Neutral     Disagree     Strongly Disagree     Not Sure/Don't Know

7. In my experience, the increasing number of authors on academic publications significantly adds to the difficulty of judging whether a candidate merits promotion.

- Strongly Agree     Agree     Neutral     Disagree     Strongly Disagree     Not Sure/Don't Know

# AUTHORSHIP ORDER

The following questions address three authorship components of a published project:

- a) initial conception- i.e. conceiving of the project and refining key ideas,
- b) work performed to complete the project- i.e. physical and intellectual work, including manuscript writing, and
- c) supervision- i.e. provision of expertise and funding.

The questions ask about these components in papers with 3 or 5 authors with the corresponding author being the 3<sup>rd</sup> or 5<sup>th</sup> author.

**Place an X on each bar and fill in a percentage at the end of each bar.**

8. For a peer-reviewed publication written by **3 authors with the last author as corresponding author**, how would you apportion credit among the authors for each of the following components?

a) **Initial conception of the project**

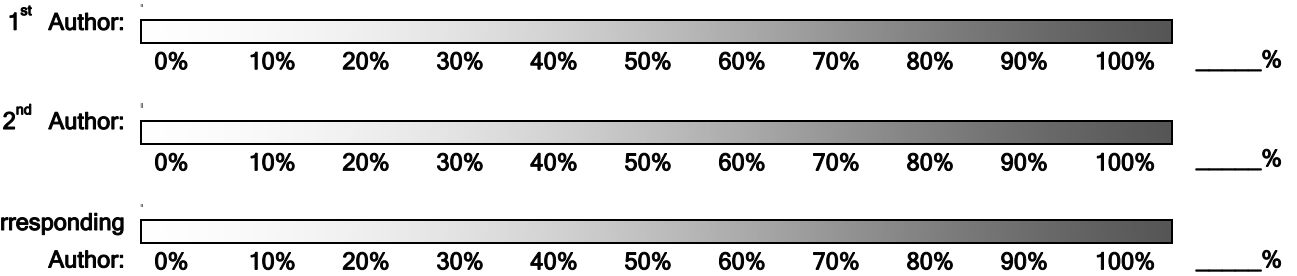

b) **Work performed to complete the project**

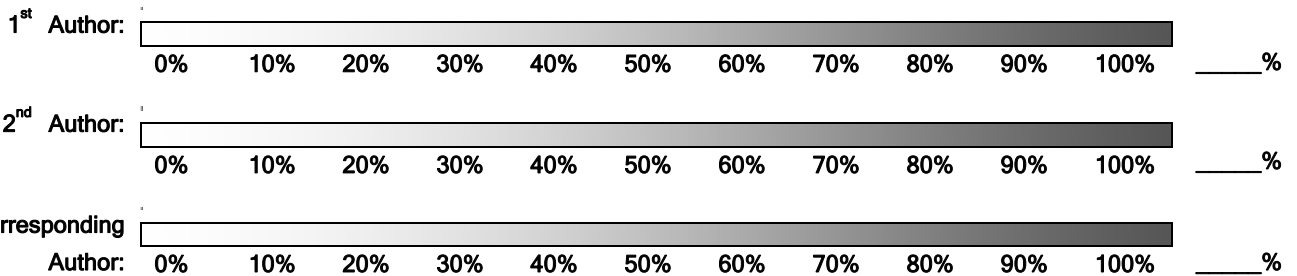

c) **Supervision of the project**

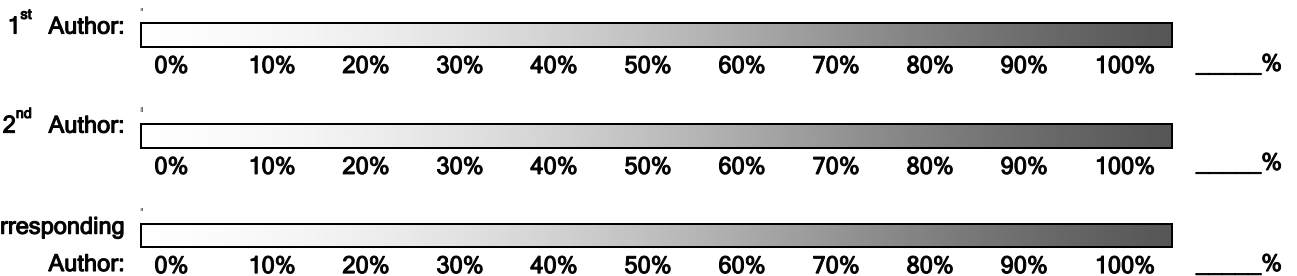

9. For a peer-reviewed publication written by **5 authors with the last author as corresponding author**, how would you apportion credit among the authors for each of the following components?

**a) Initial conception of the project**

|                                           |                      |    |     |     |     |     |     |     |     |     |     |      |        |
|-------------------------------------------|----------------------|----|-----|-----|-----|-----|-----|-----|-----|-----|-----|------|--------|
| 1 <sup>st</sup> Author:                   | <input type="text"/> | 0% | 10% | 20% | 30% | 40% | 50% | 60% | 70% | 80% | 90% | 100% | _____% |
| 2 <sup>nd</sup> Author:                   | <input type="text"/> | 0% | 10% | 20% | 30% | 40% | 50% | 60% | 70% | 80% | 90% | 100% | _____% |
| 3 <sup>rd</sup> Author:                   | <input type="text"/> | 0% | 10% | 20% | 30% | 40% | 50% | 60% | 70% | 80% | 90% | 100% | _____% |
| 4 <sup>th</sup> Author:                   | <input type="text"/> | 0% | 10% | 20% | 30% | 40% | 50% | 60% | 70% | 80% | 90% | 100% | _____% |
| 5 <sup>th</sup> and Corresponding Author: | <input type="text"/> | 0% | 10% | 20% | 30% | 40% | 50% | 60% | 70% | 80% | 90% | 100% | _____% |

**b) Work performed to complete the project**

|                                           |                      |    |     |     |     |     |     |     |     |     |     |      |        |
|-------------------------------------------|----------------------|----|-----|-----|-----|-----|-----|-----|-----|-----|-----|------|--------|
| 1 <sup>st</sup> Author:                   | <input type="text"/> | 0% | 10% | 20% | 30% | 40% | 50% | 60% | 70% | 80% | 90% | 100% | _____% |
| 2 <sup>nd</sup> Author:                   | <input type="text"/> | 0% | 10% | 20% | 30% | 40% | 50% | 60% | 70% | 80% | 90% | 100% | _____% |
| 3 <sup>rd</sup> Author:                   | <input type="text"/> | 0% | 10% | 20% | 30% | 40% | 50% | 60% | 70% | 80% | 90% | 100% | _____% |
| 4 <sup>th</sup> Author:                   | <input type="text"/> | 0% | 10% | 20% | 30% | 40% | 50% | 60% | 70% | 80% | 90% | 100% | _____% |
| 5 <sup>th</sup> and Corresponding Author: | <input type="text"/> | 0% | 10% | 20% | 30% | 40% | 50% | 60% | 70% | 80% | 90% | 100% | _____% |

**c) Supervision of the project**

|                                           |                      |    |     |     |     |     |     |     |     |     |     |      |        |
|-------------------------------------------|----------------------|----|-----|-----|-----|-----|-----|-----|-----|-----|-----|------|--------|
| 1 <sup>st</sup> Author:                   | <input type="text"/> | 0% | 10% | 20% | 30% | 40% | 50% | 60% | 70% | 80% | 90% | 100% | _____% |
| 2 <sup>nd</sup> Author:                   | <input type="text"/> | 0% | 10% | 20% | 30% | 40% | 50% | 60% | 70% | 80% | 90% | 100% | _____% |
| 3 <sup>rd</sup> Author:                   | <input type="text"/> | 0% | 10% | 20% | 30% | 40% | 50% | 60% | 70% | 80% | 90% | 100% | _____% |
| 4 <sup>th</sup> Author:                   | <input type="text"/> | 0% | 10% | 20% | 30% | 40% | 50% | 60% | 70% | 80% | 90% | 100% | _____% |
| 5 <sup>th</sup> and Corresponding Author: | <input type="text"/> | 0% | 10% | 20% | 30% | 40% | 50% | 60% | 70% | 80% | 90% | 100% | _____% |

10. For a peer-reviewed publication written by **5 authors with the third author as the corresponding author**, how would you apportion credit among the authors for each of the following components?

**a) Initial conception of the project**

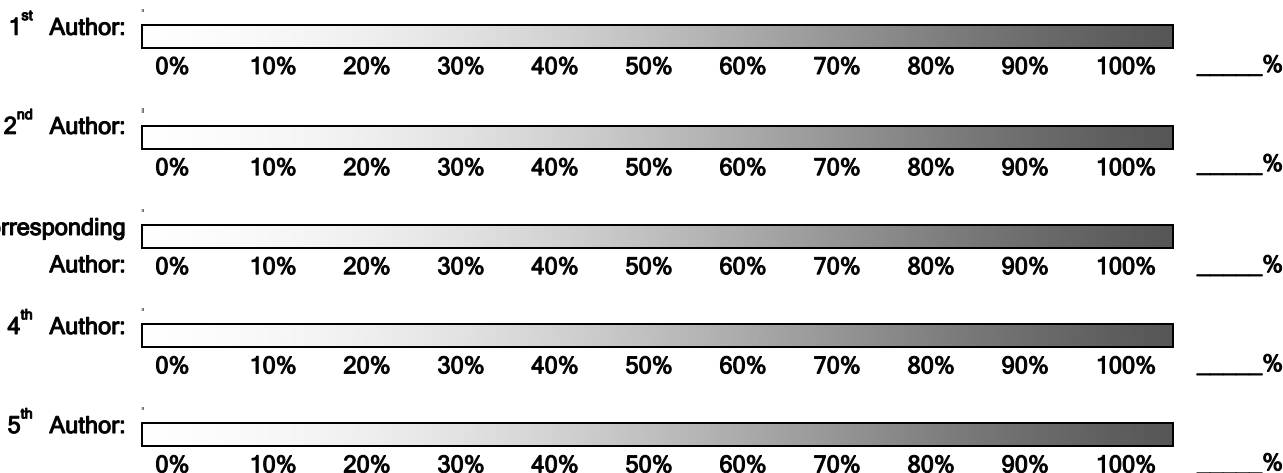

**b) Work performed to complete the project**

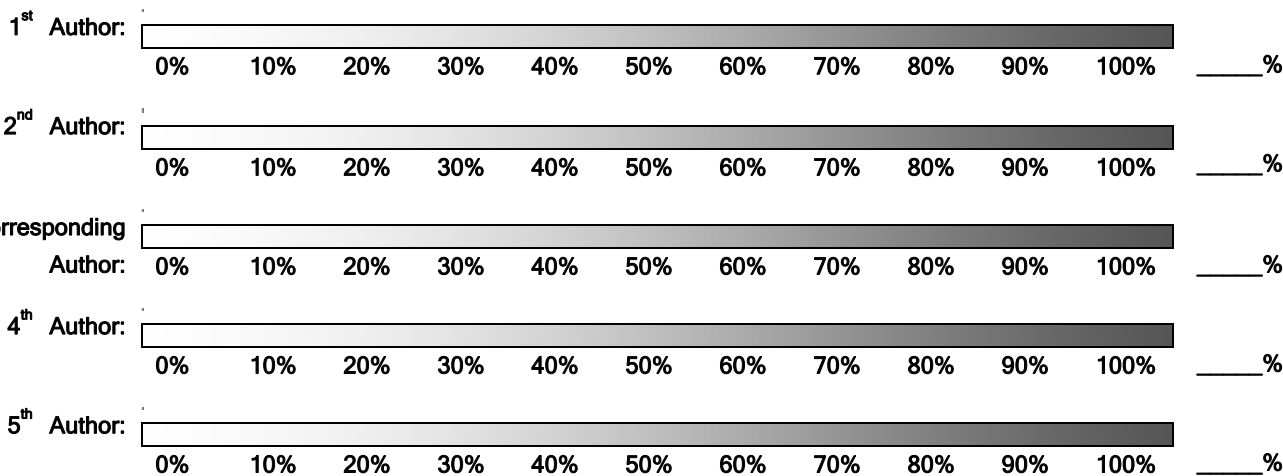

**c) Supervision of the project**

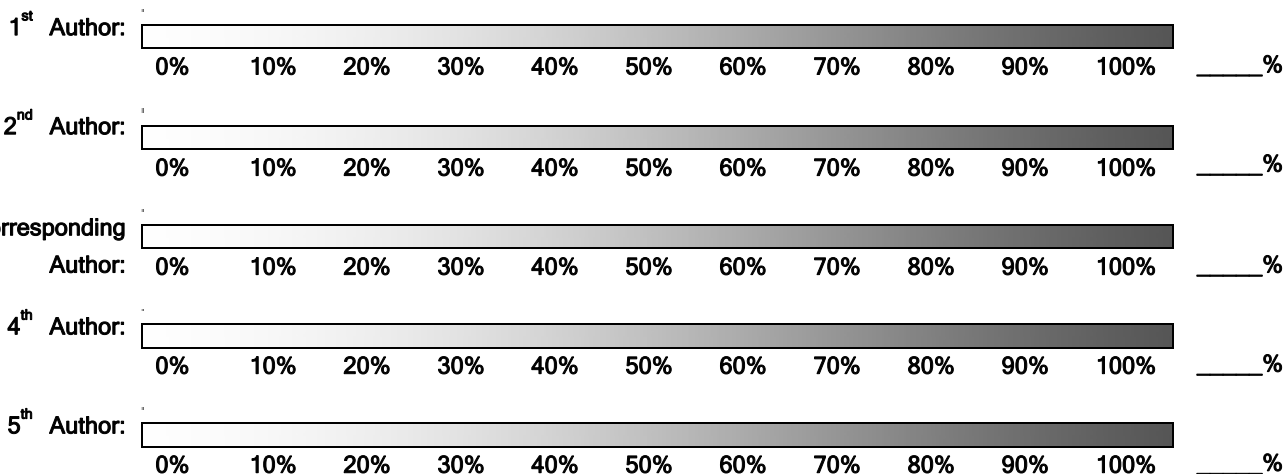

11. Does your promotion committee have a policy regarding the role of authorship order for evaluation of candidates for academic promotion?

- Yes     No

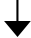

Please describe the policy.

---

---

---

---

## DEMOGRAPHICS

12. How long have you evaluated candidates for medical school faculty promotion?

- Have not evaluated candidates for promotion  
 Less than 2 years  
 2-5 years  
 More than 5 years  
 Other: \_\_\_\_\_

13. What is your current faculty rank?

- Instructor  
 Assistant Professor  
 Associate Professor  
 Professor  
 Other: \_\_\_\_\_

14. Do you have tenure?

- Yes  
 No

15. Have you ever been an editor for an academic journal?

- Yes  
 No

16. How many peer-reviewed publications have you authored?

- 0-24  
 25-49  
 50-99  
 100-199  
 200-299  
 300 or more

17. What is your age?

- <30 years old  
 30-39 years old  
 40-49 years old  
 50-59 years old  
 60-69 years old  
 >69 years old

18. What is your gender?

Female

Male

19. Please write any additional comments below.

---

---

---

---

---

---

## THANK YOU FOR COMPLETING THE SURVEY!

***Please use the enclosed envelope to return to:***

Robert Dellavalle, MD, PhD, MSPH

Study Coordinator

Department of Veterans Affairs Medical Center

1055 Clermont Street #165

Denver, CO 80220

Ph. 303-399-8020 x2475

Email: [Robert.Dellavalle@uchsc.edu](mailto:Robert.Dellavalle@uchsc.edu)
